# Supplementary material for: Medical treatment of SUNCT and SUNA: a prospective open-label study including single-arm meta-analysis
Source: PubMed Central journal article supplement — J Neurol Neurosurg Psychiatry. 2020 Dec 24;92(3):233–41. doi: 10.1136/jnnp-2020-323999 (PMC7892380; doi:10.1136/jnnp-2020-323999), 2020-12-24
Supplement: jnnp-2020-323999supp001.pdf [file jnnp-2020-323999supp001.pdf]

## Supplementary material

**Supplementary Table 1.** Summary of characteristics and potential biases of studies selected for meta-analysis

| <i>CACAO et al. 2016</i>                          |                                                                                                                                                                                                                                                                                                                                                                                |                                                                                                                                                           |
|---------------------------------------------------|--------------------------------------------------------------------------------------------------------------------------------------------------------------------------------------------------------------------------------------------------------------------------------------------------------------------------------------------------------------------------------|-----------------------------------------------------------------------------------------------------------------------------------------------------------|
| <b>Methods</b>                                    | Retrospective study.                                                                                                                                                                                                                                                                                                                                                           |                                                                                                                                                           |
| <b>Participants</b>                               | All patients seen at the clinic meeting ICHD-3beta criteria for SUNCT: 15 patients identified.                                                                                                                                                                                                                                                                                 |                                                                                                                                                           |
| <b>Interventions</b>                              | All the treatments administered to SUNCT patients at the headache clinic: surgical treatment of two symptomatic cases; lamotrigine in monotherapy from 75 to 150 mg/day; failure to lamotrigine resulted in administering one or more of the following: topiramate, carbamazepine, oxcarbazepine, gabapentin, verapamil, eslicarbazepine, indomethacin and/or corticosteroids. |                                                                                                                                                           |
| <b>Outcomes</b>                                   | Responders: no strict definition of responders provided in paper.                                                                                                                                                                                                                                                                                                              |                                                                                                                                                           |
| <i>Risk of bias</i>                               |                                                                                                                                                                                                                                                                                                                                                                                |                                                                                                                                                           |
| <b>Domain</b>                                     | <b>Risk</b>                                                                                                                                                                                                                                                                                                                                                                    | <b>Reason</b>                                                                                                                                             |
| Pre-intervention confounding                      | ‘low’                                                                                                                                                                                                                                                                                                                                                                          | No known confounding factors reported.                                                                                                                    |
| Pre-intervention selection bias                   | ‘low’                                                                                                                                                                                                                                                                                                                                                                          | All SUNCT patients seen at the clinic in a defined time window included.                                                                                  |
| Bias in classification of intervention            | ‘low’                                                                                                                                                                                                                                                                                                                                                                          | Interventions likely not misclassified as they were identified from patient records.                                                                      |
| Bias due to deviation from intended interventions | N/A                                                                                                                                                                                                                                                                                                                                                                            | No comparator group.                                                                                                                                      |
| Bias due to missing data                          | ‘moderate’                                                                                                                                                                                                                                                                                                                                                                     | No missing data for lamotrigine responders. Missing data for all other interventions.                                                                     |
| Bias in measurement of outcome                    | ‘moderate’                                                                                                                                                                                                                                                                                                                                                                     | Outcome assessors were aware of intervention and retrospective review of outcome could have influenced the measure.                                       |
| Bias in selection of the reported result          | ‘serious’                                                                                                                                                                                                                                                                                                                                                                      | Only the lamotrigine outcome was reported, likely influenced by the fact that this is the preferred treatment.                                            |
| <i>D’ANDREA et al. 2001</i>                       |                                                                                                                                                                                                                                                                                                                                                                                |                                                                                                                                                           |
| <b>Methods</b>                                    | Case series.                                                                                                                                                                                                                                                                                                                                                                   |                                                                                                                                                           |
| <b>Participants</b>                               | Five patients diagnosed with SUNCT.                                                                                                                                                                                                                                                                                                                                            |                                                                                                                                                           |
| <b>Interventions</b>                              | Lamotrigine given as monotherapy. Starting with 25 mg titrated up to a dose of 125-200 mg daily.                                                                                                                                                                                                                                                                               |                                                                                                                                                           |
| <b>Outcomes</b>                                   | Qualitative and quantitative (percentage reduction) description of change in attack frequency.                                                                                                                                                                                                                                                                                 |                                                                                                                                                           |
| <i>Risk of bias</i>                               |                                                                                                                                                                                                                                                                                                                                                                                |                                                                                                                                                           |
| <b>Category</b>                                   | <b>Risk</b>                                                                                                                                                                                                                                                                                                                                                                    | <b>Reason</b>                                                                                                                                             |
| Pre-intervention confounding                      | ‘no information’                                                                                                                                                                                                                                                                                                                                                               | Too limited information provided in paper to determine possible confounders.                                                                              |
| Pre-intervention selection bias                   | ‘moderate’                                                                                                                                                                                                                                                                                                                                                                     | Five consecutive patients seem to have been treated with lamotrigine, though this is not clearly described. Uncertain if other patients are not reported. |
| Bias in classification of intervention            | ‘low’                                                                                                                                                                                                                                                                                                                                                                          | Interventions likely not misclassified as they were administered prospectively.                                                                           |

|                                                   |                                                                                                                                                                                                                                                                                                                                                |                                                                                                                                 |
|---------------------------------------------------|------------------------------------------------------------------------------------------------------------------------------------------------------------------------------------------------------------------------------------------------------------------------------------------------------------------------------------------------|---------------------------------------------------------------------------------------------------------------------------------|
| Bias due to deviation from intended interventions | N/A                                                                                                                                                                                                                                                                                                                                            | No comparator group.                                                                                                            |
| Bias due to missing data                          | 'low'                                                                                                                                                                                                                                                                                                                                          | Outcome data available for all patients.                                                                                        |
| Bias in measurement of outcome                    | 'moderate'                                                                                                                                                                                                                                                                                                                                     | A percentage change in headache frequency is provided, but there is no description of how this change was ascertained.          |
| Bias in selection of the reported result          | 'moderate'                                                                                                                                                                                                                                                                                                                                     | Sparse reporting of outcomes.                                                                                                   |
| <b>ETEMADIFAR et al. 2008</b>                     |                                                                                                                                                                                                                                                                                                                                                |                                                                                                                                 |
| <b>Methods</b>                                    | Prospective 'before-after' trial.                                                                                                                                                                                                                                                                                                              |                                                                                                                                 |
| <b>Participants</b>                               | Eight patients diagnosed with SUNCT according to ICHD-2. Recruited from University Hospital headache clinic in Isfahan, Iran.                                                                                                                                                                                                                  |                                                                                                                                 |
| <b>Interventions</b>                              | Gabapentin 600 to 900 mg/day.                                                                                                                                                                                                                                                                                                                  |                                                                                                                                 |
| <b>Outcomes</b>                                   | Frequency, intensity and duration of headache attacks. Side-effects.                                                                                                                                                                                                                                                                           |                                                                                                                                 |
| <i>Risk of bias</i>                               |                                                                                                                                                                                                                                                                                                                                                |                                                                                                                                 |
| <b>Category</b>                                   | <b>Risk</b>                                                                                                                                                                                                                                                                                                                                    | <b>Reason</b>                                                                                                                   |
| Pre-intervention confounding                      | 'moderate'                                                                                                                                                                                                                                                                                                                                     | Failure to a series of treatments used as inclusion criterion, and prophylactic headache treatment used as exclusion criterion. |
| Pre-intervention selection bias                   | 'moderate'                                                                                                                                                                                                                                                                                                                                     | Unclear how patients were selected from the population.                                                                         |
| Bias in classification of intervention            | 'low'                                                                                                                                                                                                                                                                                                                                          | Interventions likely not misclassified as they were administered prospectively.                                                 |
| Bias due to deviation from intended interventions | N/A                                                                                                                                                                                                                                                                                                                                            | No comparator group.                                                                                                            |
| Bias due to missing data                          | 'low'                                                                                                                                                                                                                                                                                                                                          | Outcome data available for all patients.                                                                                        |
| Bias in measurement of outcome                    | 'low'                                                                                                                                                                                                                                                                                                                                          | Outcome prospectively captured in headache diary.                                                                               |
| Bias in selection of the reported result          | 'low'                                                                                                                                                                                                                                                                                                                                          | All prespecified outcomes reported.                                                                                             |
| <b>WENG et al. 2017</b>                           |                                                                                                                                                                                                                                                                                                                                                |                                                                                                                                 |
| <b>Methods</b>                                    | Retrospective audit of patients attending three different clinical sites: National Hospital for Neurology and Neurosurgery (NHNN), London, UK, between 2002 and 2007; the Headache Center, University of California, San Francisco (UCSF), San Francisco, CA, USA, from 2007 to 2013; King's College Hospital, London, UK from 2013 to 2015.   |                                                                                                                                 |
| <b>Participants</b>                               | 65 SUNCT and 37 SUNA patients diagnosed according to ICHD2 or ICHD-3beta                                                                                                                                                                                                                                                                       |                                                                                                                                 |
| <b>Interventions</b>                              | All treatments used for SUNCT and SUNA at the headache clinic including: sumatriptan, oxygen, indomethacin, lidocaine, dihydroergotamine, corticosteroids, greater occipital nerve blockades, lamotrigine, topiramate, gabapentin, carbamazepine, oxcarbazepine, pregabalin, verapamil, valproate, betablockers and tricyclic antidepressants. |                                                                                                                                 |
| <b>Outcomes</b>                                   | Clinical effect defined as patients subjective report of their effect, and record in journal documentation.                                                                                                                                                                                                                                    |                                                                                                                                 |
| <i>Risk of bias</i>                               |                                                                                                                                                                                                                                                                                                                                                |                                                                                                                                 |
| <b>Category</b>                                   | <b>Risk</b>                                                                                                                                                                                                                                                                                                                                    | <b>Reason</b>                                                                                                                   |
| Pre-intervention confounding                      | 'low'                                                                                                                                                                                                                                                                                                                                          | No known confounding factors reported.                                                                                          |

|                                                   |                                                                                                                                                                                    |                                                                                                                                                                             |
|---------------------------------------------------|------------------------------------------------------------------------------------------------------------------------------------------------------------------------------------|-----------------------------------------------------------------------------------------------------------------------------------------------------------------------------|
| Pre-intervention selection bias                   | 'moderate'                                                                                                                                                                         | Appears to be all SUNCT and SUNA patients seen at the clinic in a defined time window included, but this is not stated explicitly.                                          |
| Bias in classification of intervention            | 'low'                                                                                                                                                                              | Interventions likely not misclassified as they were identified from patient records.                                                                                        |
| Bias due to deviation from intended interventions | N/A                                                                                                                                                                                | No comparator group.                                                                                                                                                        |
| Bias due to missing data                          | 'low'                                                                                                                                                                              | Clinical effect of all used interventions reported. No mention of missing data in paper.                                                                                    |
| Bias in measurement of outcome                    | 'moderate'                                                                                                                                                                         | Outcome assessors were aware of intervention and retrospective review of outcome could have influenced the measure. Patients subjective report of clinical effect was used. |
| Bias in selection of the reported result          | 'low'                                                                                                                                                                              | Outcomes of all interventions reported.                                                                                                                                     |
| <b>WILLIAMS and BROADLEY. 2008</b>                |                                                                                                                                                                                    |                                                                                                                                                                             |
| <b>Methods</b>                                    | Prospective study.                                                                                                                                                                 |                                                                                                                                                                             |
| <b>Participants</b>                               | 24 cases of SUNCT and/or SUNA diagnosed according to IHS criteria.                                                                                                                 |                                                                                                                                                                             |
| <b>Interventions</b>                              | Lamotrigine in a dose of 25 to 600 mg/day as prophylactic medication. Hospitalization and lignocaine infusion if symptoms were affecting daily activities to a very severe degree. |                                                                                                                                                                             |
| <b>Outcomes</b>                                   | Response to medication defined by percentage reduction in headache frequency and/or severity.                                                                                      |                                                                                                                                                                             |
| <i>Risk of bias</i>                               |                                                                                                                                                                                    |                                                                                                                                                                             |
| <b>Category</b>                                   | <b>Risk</b>                                                                                                                                                                        | <b>Reason</b>                                                                                                                                                               |
| Pre-intervention confounding                      | 'low'                                                                                                                                                                              | No known confounding factors reported.                                                                                                                                      |
| Pre-intervention selection bias                   | 'low'                                                                                                                                                                              | All SUNCT patients seen at the clinic in a defined time window included.                                                                                                    |
| Bias in classification of intervention            | 'low'                                                                                                                                                                              | Interventions likely not misclassified as they were administered prospectively.                                                                                             |
| Bias due to deviation from intended interventions | N/A                                                                                                                                                                                | No comparator group.                                                                                                                                                        |
| Bias due to missing data                          | 'low'                                                                                                                                                                              | No missing data.                                                                                                                                                            |
| Bias in measurement of outcome                    | 'moderate'                                                                                                                                                                         | Outcome assessors were aware of intervention and retrospective review of outcome could have influenced the measure.                                                         |
| Bias in selection of the reported result          | 'moderate'                                                                                                                                                                         | Prespecified outcomes reported. In addition, outcomes of several other interventions that were not prespecified in methods were reported.                                   |
